# Supplementary material
Source: Springer Nature journal article supplement (https://www.springermedizin.de/resource/supplementary/12960_2009_230_MOESM1_ESM.pdf/9570692)

### Malawi (2005-2008)

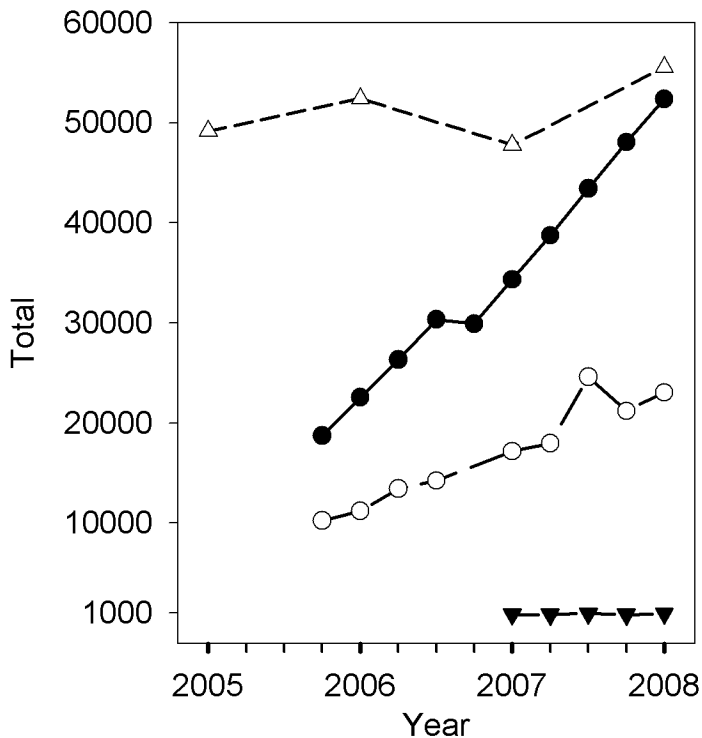

### Zambia (2004-2007)

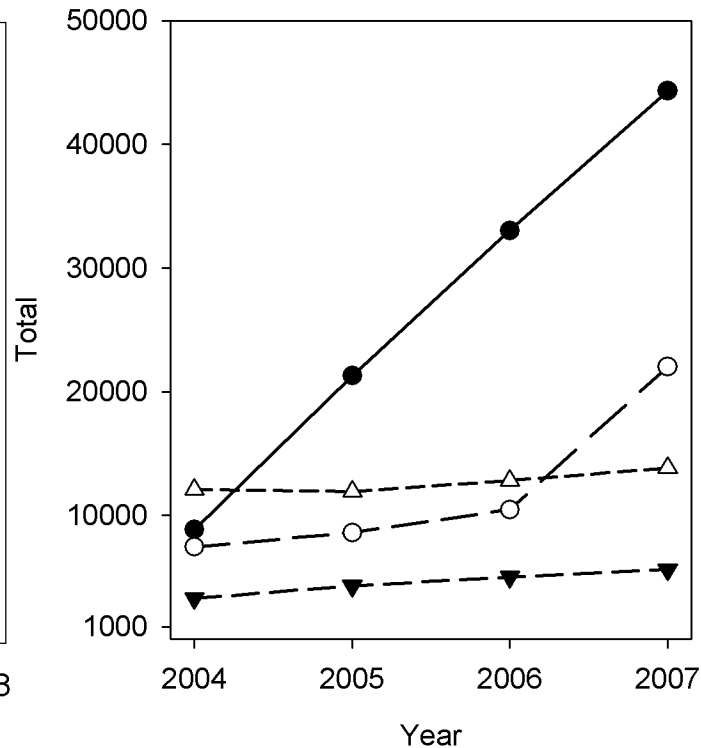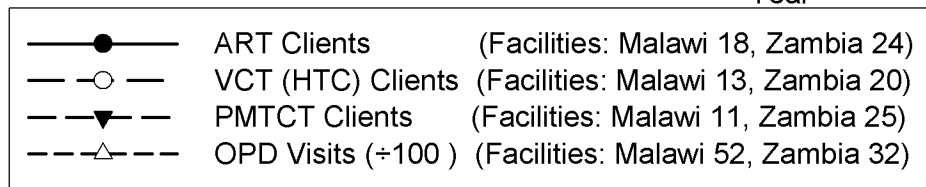

Supplement: MOESM1 [file 9570692]
